# Supplementary material
Source: PubMed Central journal article supplement (PMC4395786)
Supplement: mt20152x1.pdf [file mt20152x1.pdf]

Figure S1; Durben et al.

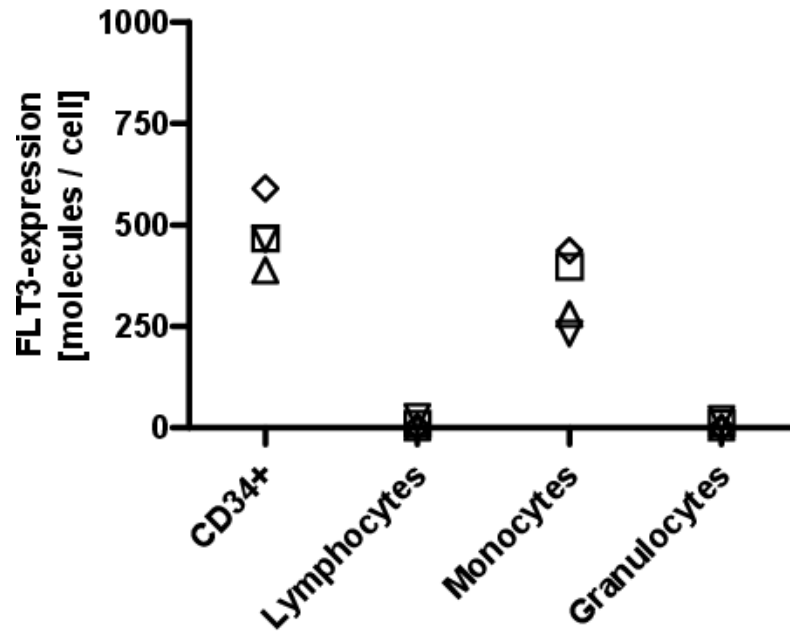

**Fig. S1:**

**FACS analysis of FLT3 expression on different subpopulations of normal bone marrow cultures.** Bone marrow cells of four different healthy subjects (□△▽◇) were analyzed by flow cytometry. Subpopulations were defined by flow cytometry as indicated, and FLT3 expression was determined as described in the Methods section.

Figure S2; Durben et al.

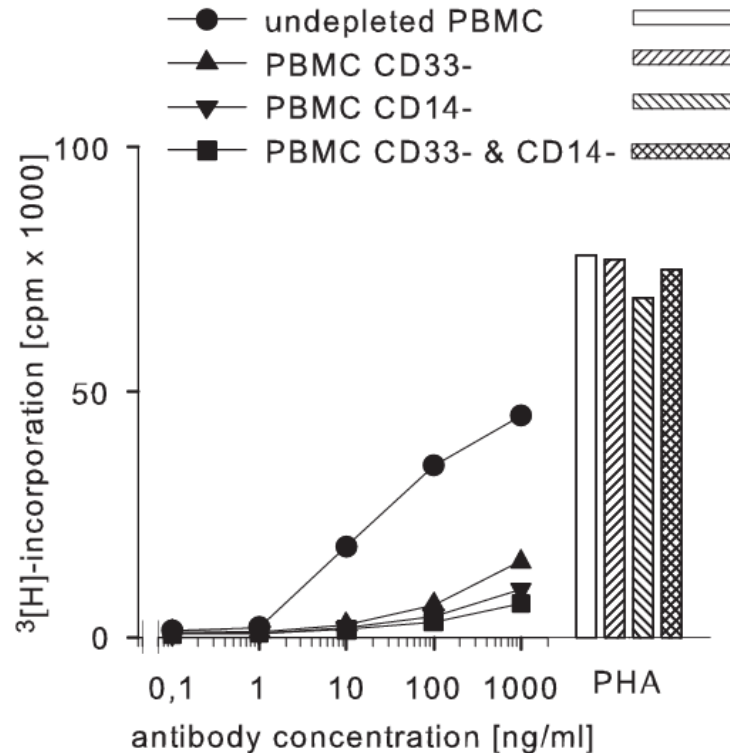

**Fig. S2:**

**Activation of normal PBMC and PBMC subpopulations by the 4G8 X UCHT1 Fabsc-antibody.** Undepleted PBMC (●), PBMC depleted of CD33+ cells (▲) or CD14+ cells (▼), or CD14+ and CD33+ cells (■) were incubated for two days with the indicated amounts of the bispecific 4G8 X UCHT1 Fabsc-antibody. Bars on the right show that the response of the different cell populations to polyclonal stimulation with PHA is comparable.
